# Supplementary material for: A study of peri-implant tissue clinical parameters in patients starting anti-osteoporosis medication after existing implant function: a prospective cohort study
Source: Research Square preprint supplement (doi:10.21203/rs.3.rs-4611588/v1), 2024-07-18
Supplement: Supplementary file 1 [file ce926883b6d84ec91787270f.xlsx]

## Sheet: Table 1
	Table 1 Demographic and patient characteristics of the AOM and the control groups
				AOM (n = 24)	Control (n = 70)	P value	Significant difference
	a	Sex
			Female	21 (87.5)	38 (54.3)	0.00368	**
	c	Age (years)		76.7 ± 6.3	67.4 ± 9.5	1.27e-06	**
	c	Body mass index (kg/m2)		21.7 ± 2.6	22.6 ± 3.0	0.189	ns
	a	History of fragility fracture		9 (37.5)	3 (4.3)	2.58e-05	**
	a	Smoking		5 (20.8)	22 (31.4)	0.322	ns
	a	History of periodontitis (moderate to severe)		17 (70.8)	30 (42.8)	0.0333	**
		Mandibular cortical index
		b	Class 1	0 (0)	22 (31.4)	0.000659	**
		a	Class 2	13 (54.2)	37 (52.0)	0.912	ns
		a	Class 3	11 (45.8)	11 (15.7)	0.00264	**
		Antiresorptive therapy *overlapping
			Bisphosphonate (oral 18, injection 1)	19
			Denosumab	2
			Tocilizumab	1
			Teriparatide	3
			Selective estrogen receptor modulator	6
			Vitamin D3	15
			Calcium L-aspartate hydrate	1
			Methotrexate	2
		Duration of antiresorptive therapy (years)		3.6 ± 2.7 (1–16)
			1–3 years	26
			over 4 years	23
			Mean ± S.D., or n (%), aChi-square test, bFisher's exact test, cStudent's t-test
			AOM, anti-osteoporosis medication; ns, not significant; **P < 0.01

## Sheet: Table 2 
	Table 2 Medication data for the AOM group
	Case	Age	Sex	Primary disease	Medication	Type	Interval	Duration	Number of	Type of MRONJ
								(years)	existing implants
	1	73	Male	Osteoporosis, prostate cancer	Denosumab	Subcutaneous injection	6 months	16	4
	2	72	Female	Osteoporosis	Raloxifene hydrochloride	Oral	Daily	4	7
					Alfacalcidol (VD3)	Oral	Daily	4	7
	3	86	Female	Osteoporosis	Alendronate	Oral	Daily	4	4
					Eldecalcitol (VD3)	Oral	Daily	4	4
					Teriparatide	Subcutaneous injection	1 week	2	4
	4	72	Female	Osteoporosis, rheumatoid arthritis	Eldecalcitol (VD3)	Oral	Daily	4	2
					Methotrexate	Oral	A few days	4	2
	5	61	Female	Osteoporosis, breast cancer	Alendronate	Oral	Daily	5	1
					Eldecalcitol (VD3)	Oral	Daily	5	1
	6	79	Female	Osteoporosis, thyroid cancer	Alendronate	Oral	1 week	4	4	PI-MRONJ
					Raloxifene hydrochloride	Oral	Daily	7	4
	7	79	Female	Osteoporosis	Minodronate	Oral	4 weeks	8	3
					Teriparatide	Subcutaneous injection	1 week	2	3
	8	73	Female	Osteoporosis	Teriparatide	Subcutaneous injection	3 days	2	8
					Alfacalcidol (VD3)	Oral	Daily	2	8
	9	75	Female	Osteoporosis	Minodronate	Oral	4 weeks	2	9
					Alfacalcidol (VD3)	Oral	Daily	2	1
					Alfacalcidol (VD3)	Oral	Daily	2	1
	10	76	Female	Osteoporosis	Bazedoxifene Acetate	Oral	Daily	5	3
					Eldecalcitol (VD3)	Oral	Daily	7	3
					Alendronate	Oral	Daily	2	3
	11	80	Female	Osteoporosis	Minodronate	Oral	4 weeks	11	9
	12	82	Female	Osteoporosis	Minodronate	Oral	4 weeks	4	2
	13	73	Female	Osteoporosis	Alendronate	Oral	1 week	1	6
	14	85	Male	Osteoporosis, renal pelvis cancer	Unknown BPs	Oral	Daily	4	2
					Unknown VD3	Oral	Daily	4	2
	15	86	Female	Osteoporosis	Unknown BPs	Oral	Daily	2	2
	16	72	Female	Osteoporosis, rheumatoid arthritis	Risedronate	Oral	Daily	2	2	MRONJ
					Eldecalcitol (VD3)	Oral	Daily	2	2
					Ibandronate	Oral	Daily	3	2
					Tocilizumab	Subcutaneous injection	1 week	4	2
					Methotrexate	Oral	1 week	3	2
	17	83	Female	Osteoporosis	Alendronate	Oral	1 week	1	3
					Eldecalcitol (VD3)	Oral	Daily	3	3
					Bazedoxifene acetate	Oral	Daily	1	3
	18	80	Female	Osteoporosis	Eldecalcitol (VD3)	Oral	Daily	2	3
					Raloxifene hydrochloride	Oral	Daily	2	3
	19	87	Male	Osteoporosis	Minodronate	Oral	Daily	2	3	PI-MRONJ
					Eldecalcitol (VD3)	Oral	Daily	2	3
					Calcium L-aspartate hydrate	Oral	Daily	2	3
					Denosumab	Subcutaneous injection	6 months	2	3
	20	72	Female	Osteoporosis	Ibandronate	Subcutaneous injection	1 month	7	3
					Eldecalcitol (VD3)	Oral	Daily	5	3
					Raloxifene hydrochloride	Oral	Daily	5	3
	21	72	Female	Osteoporosis	Alendronate	Oral	Daily	2	1
	22	71	Female	Osteoporosis	Eldecalcitol (VD3)	Oral	Daily	1	5
	23	72	Female	Osteoporosis, stomach cancer	Risedronate	Oral	1 week	2	1
	24	79	Female	Osteoporosis	Risedronate	Oral	1 week	1	12
	AOM, anti-osteoporosis medication; MRONJ, medication-related osteonecrosis of the jaw; PI-MRONJ, peri-implant MRONJ; VD3, vitamin D3

## Sheet: Table 3
	Table 3 Implant characteristics for the AOM group and the control group
				AOM (n = 93)	Control (n = 177)	P value	Significant difference
	a	Implant site
			Maxilla	46 (49.4)	88 (49.7)	1	ns
			Mandible	47 (50.5)	89 (50.2)
	a	Peri-implantitis		25 (26.9)	21 (11.9)	0.00182	**
	b	Peri-implant MRONJ		4 (4.3)	0 (0)	0.0135	*
	a	Superstructure
			Cement retention	43 (46.2)	63 (35.6)	0.116	ns
			Screw retention (include side-screw system)	50 (53.8)	114 (64.4)
	c	Mean maintenance duration (years)		14.2 ± 6.5	11.0 ± 5.3	0.00182	*
			(range, median)	(3–26, 15.5)	(1–20, 11.5)
			Mean ± S.D., n (%), aChi-square test, bFisher's exact test, cStudent's t-test
			AOM, antiosteoporosis medication; MRONJ, medication-related osteonecrosis of the jaw; ns, not significant; *P < 0.05, **P < 0.01

## Sheet: Table 4
Table 4 Clinical parameters for the AOM and control groups
			Baseline					Last visit					Variation
			iPPD (mm)		iBoP (0-1)	MBL (mm)		iPPD (mm)		iBoP (0-1)	MBL (mm)		iPPD (mm)		iBoP (0-1)	MBL (mm)
			mean	maximum				mean	maximum				mean	maximum
		AOM group	3.2 ± 1.2	3.8 ± 1.7	0.2 ± 0.2	1.4 ± 1.1		4.0 ± 2.2	4.9 ± 2.5	0.3 ± 0.4	2.4 ± 2.6		0.8 ± 1.9	1.0 ± 2.0	0.2 ± 0.4	2.0 ± 6.4
		(range, median)	(0–11.0, 3)	(0–12.0, 3)	(0–1, 0)	(0–5.0, 1.2)		(2.0–11.0, 3.2)	(2.0–11.0, 4)	(0–1, 0.2)	(0–11.0, 1.7)		(−1.3–8.0, 0.2)	(−3.0–8.0, 1)	(−1–1, 0)	(−1.2–10.8, 0.3)
		Control group	2.9 ± 0.5	3.5 ± 0.9	0.2 ± 0.2	1.4 ± 1.2		3.4 ± 1.8	4.1 ± 2.0	0.2 ± 0.3	2.2 ± 2.5		0.4 ± 1.5	0.6 ± 1.8	0 ± 1.8	0.8 ± 2.0
		(range, median)	(1.8–6.7, 3)	(2.0–8.0, 3)	(0–1, 0.2)	(0–9.0, 1.2)		(0–13.0, 3)	(2.0–13.0, 4)	(0–1, 0)	(0–13.0, 1.5)		(－2.2–9.2, 0.2)	(−5.0–8.0, 0)	(−1–1, 0)	(−2.5–11.8, 0.2)
		Significant difference	*	ns	ns	ns		*	*	**	ns		ns	ns	**	**
		Mean ± S.D., Mann-Whitney U test
		AOM, antiosteoporosis medication; iPPD, implant probing depth; iBoP, implant bleeding on probing; MBL, marginal bone resorption; ns, not significant; *P < 0.05, **P < 0.01

## Sheet: Table 5
Table 5 Risk indicators for peri-implantitis according to logistic regression analysis
	Explanatory variable			Unadjusted			Adjusted
				Odds ratio	[95% CI]	P value	Odds ratio	[95% CI]	P value
	AOM (yes; 1, no; 0)			2.73	[1.43–5.21]	**	1.85	[0.82–4.20]	ns
	Sex (female; 1, male; 0)			1.28	[0.64–2.57]	ns	0.541	[0.21–1.39]	ns
	Age (over 70; 1, others; 0)			2.97	[1.37–6.45]	**	2.02	[0.87–4.71]	ns
	History of fragility fracture (yes; 1, no; 0)			0.892	[0.40–1.98]	**	0.465	[0.18–1.21]	ns
	History of periodontitis (yes; 1, no; 1)			15.3	[3.63–64.80]	**	15.8	[3.60–69.3]	**
	MCI (class 3; 1, others; 0)			2.79	[1.46–5.33]	**	3.34	[1.43–7.81]	**
	Observational duration (over 12 years; 1, others; 0)			1.03	[0.54–1.95]	**	1.24	[0.60–2.55]	ns
	AOM, anti-osteoporosis medication; CI, confidence interval; MCI, mandibular cortical index; ns, not significant; **P < 0.01
	Adjusted for AOM use, sex, age, fracture, periodontitis, MCI, and duration of maintenance
